# Supplementary material for: Pelota-interacting G protein Hbs1 is required for spermatogenesis in Drosophila
Source: Sci Rep. 2019 Mar 1;9:3226. doi: 10.1038/s41598-019-39530-6 (PMC6397311; doi:10.1038/s41598-019-39530-6)
Supplement: Supplementary file 1 — Supplementary info [file 41598_2019_39530_MOESM1_ESM.pdf]

# Pelota-interacting G protein Hbs1 is required for spermatogenesis in *Drosophila*

Zhaohui Li, Fu Yang, Yang Xuan, Rongwen Xi, Rui Zhao

## Supplementary Information

### Supplementary Figure Legends

#### Figure S1. Sequence alignment among Hbs1 orthologs across different species.

gi|6322937|ref|NP\_013010.1| Hbs1 [Saccharomyces cerevisiae];  
gi|30683251|ref|NP\_196625.2| putative EF-1-alpha [Arabidopsis thaliana];  
gi|115532067|ref|NP\_001021556.2| K07A12.4b [Caenorhabditis elegans];  
gi|45550900|ref|NP\_652729.2| HBS1 CG1898-PA [Drosophila melanogaster];  
gi|148223485|ref|NP\_001085851.1| MGC80911 protein [Xenopus laevis];  
gi|118088523|ref|XP\_001234091.1| PREDICTED: HBS1-like [Gallus gallus];  
gi|41054437|ref|NP\_955970.1| Hbs1-like [Danio rerio];  
gi|110611222|ref|NP\_062676.2| Hbs1-like isoform 1 [Mus musculus];  
gi|5729864|ref|NP\_006611.1| HBS1-like [Homo sapiens].

Identical amino acids are highlighted by black boxes, and similar amino acids are highlighted by grey boxes.

#### Figure S2. *Pelo* is required for both meiosis and spermatid individualization during spermatogenesis.

(A-F) Phase-contrast photographs analyzing the content of unfixed testis of wild type and *pelo* mutant flies (n=2). Onion stage spermatids with dark nebenkern (arrow) and light nuclei (arrow head) of similar size were detected in wild type testis (A-B). *pelo*<sup>PB60/-</sup> and *pelo*<sup>PA13</sup> mutants showed defects of meiosis, with abnormally large spermatids containing 4N (arrow) or 2N (arrow head) chromosomal content with large nebenkern (hollow arrow) (C-F). (G) ICs (marked by Phalloidin in red) could not be detected and the nuclei are scattered (marked by dapi in blue, arrow) in *pelo*<sup>PB60/-</sup> mutant testis. (H-I) There are intact ICs (marked by Phalloidin in red, arrow) both at the distal end and the apical end of the testis in the *nos*-Gal4 driver alone (H, a genetic control for Fig4A-G). There was also no significant difference between the number of ICs in *nos*-Gal4 driver lines and that in *Hbs*<sup>1/+</sup> lines (I). Mean ± SEM. n=20. ns, no significance. *t* test. In A-F, scale bars = 10µm. In G-H, scale bars = 50µm.

**Figure S3. The Hbs1-binding motif of Pelo is important for its function.**

(A) Quantitative RT-PCR analysis of the relative *pelo* expression. In the mutant fly, the expression of *pelo* decreased to almost half of the wild type, and both transgenes are correctly expressed. (B) P210A could only partially rescue the GSCs loss. wild type is *w1118*, the mutant is *pelo*<sup>1/PB60</sup>; *nosGal4VP16*, U-*pelo* is *pelo*<sup>1/PB60</sup>; *nosGal4VP16*; U-*pelo* and P210A is *pelo*<sup>1/PB60</sup>; *nosGal4VP16*; U-P210A.

**Figure S4. *pelo*, but not *Hbs1*, is required for male GSC maintenance.** (A) A testis genotyped *pelo*<sup>PA13</sup>/Cyo contains 8-10 GSCs per hub (asterisk, marked by E-cadherin, red) on average at day 7. (B) The GSC (marked by cells stained with vasa (green) in close contact with the hub) number was significantly decreased in flies that were homozygous for *pelo*<sup>PA13</sup>. (C) GSCs continued to decrease towards day 15. (D) On average, 8-10 GSCs could be found at the hub of a *pelo*<sup>PB60</sup>/Cyo testis at day 7. (E) About 5 GSCs left in *pelo*<sup>PB60/-</sup> mutant testis at day 7. (F) Only 2-3 GSCs existed in those *pelo*<sup>PB60/-</sup> mutant testis at day 15. (G) A *Hbs1*<sup>1/-</sup> testis at day 20 was shown with around 8-9 GSCs surrounding the hub. (H-J) Double mutant testis genotyped either for *pelo*<sup>PA13/-</sup>; *Hbs1*<sup>1/-</sup> (H) or *pelo*<sup>PB60/-</sup>; *Hbs1*<sup>1/-</sup> (I) showed neither suppression nor enhancement of the GSC loss phenotype compared to the *pelo* single mutants along (day 15). The averaged GSC numbers per hub under different genetic conditions are illustrated in J (7D, 15D and 20D are the abbreviation for 7days, 15days and 20days, respectively). (K-M') *Hbs1*<sup>1/-</sup> showed no effect on spermatogonial (Bam-GFP positive cells. K' and M' are enlarged figures of K and M, respectively. DAPI is in blue in from A-I, K-L. GSCs and Bam-GFP+ cells are outlined by dotted lines. In A-I, scale bars = 20μm. In K-L, scale bars = 50 μm.

## Supplementary Figures

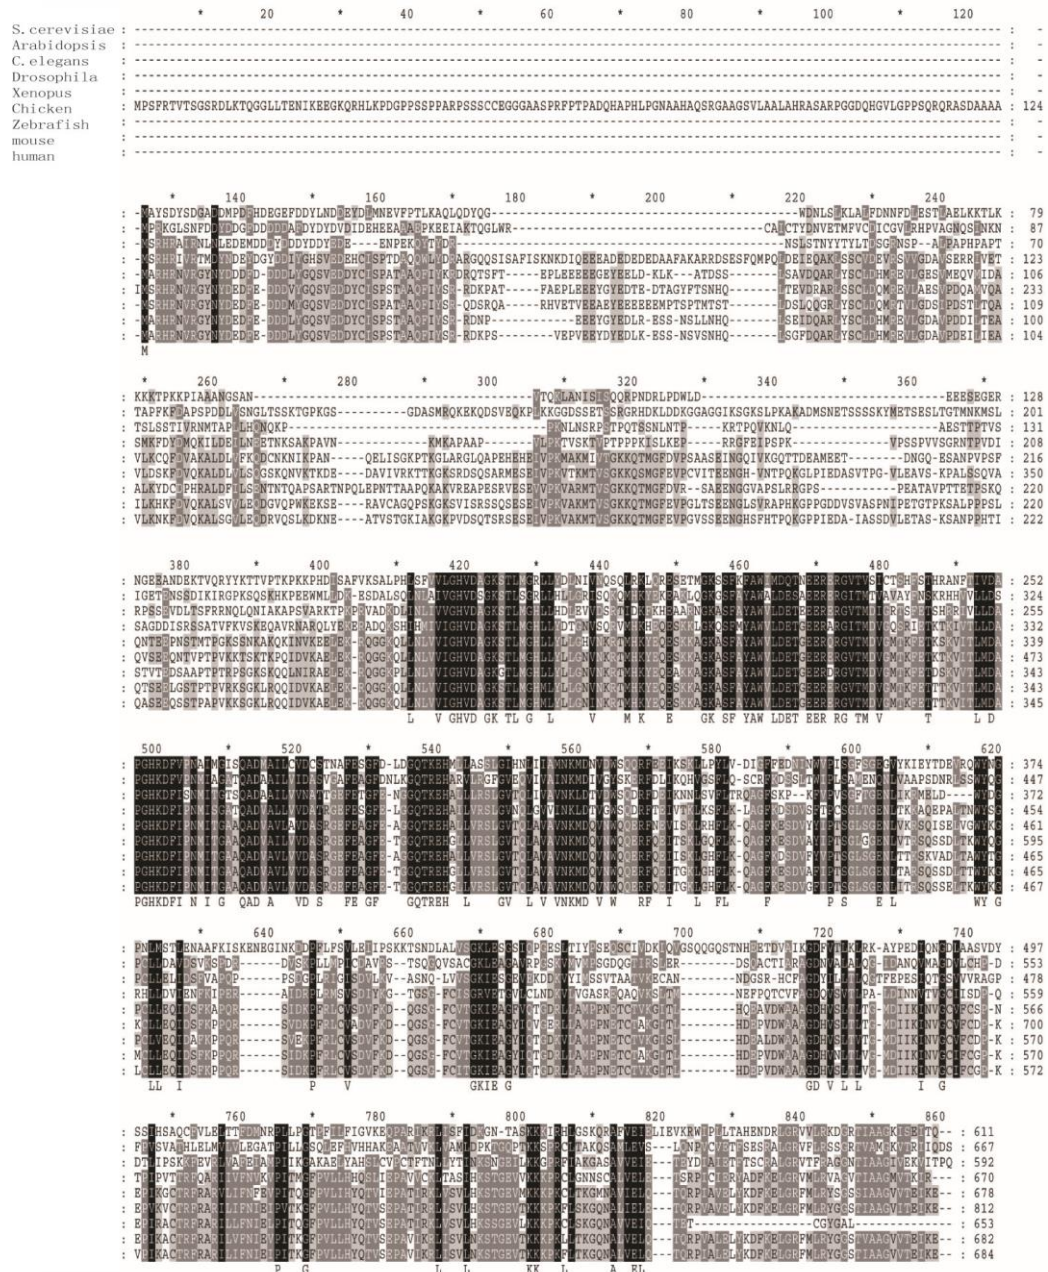

Figure S1

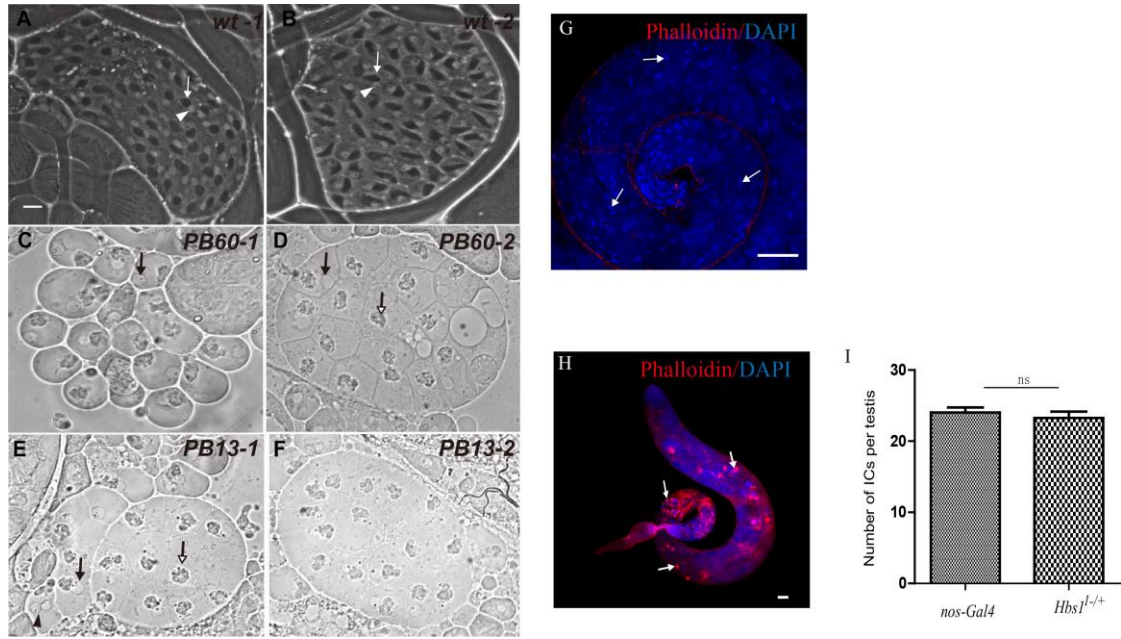

Figure S2

A

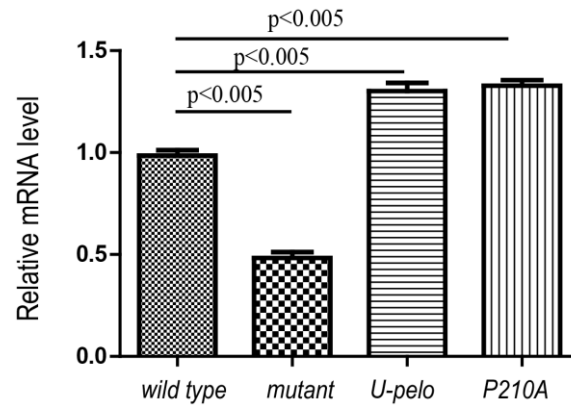

B

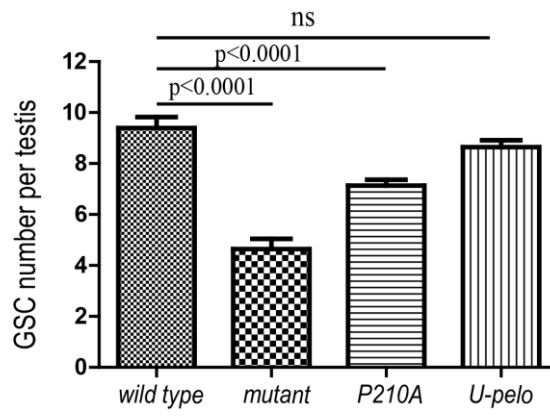

Figure S3

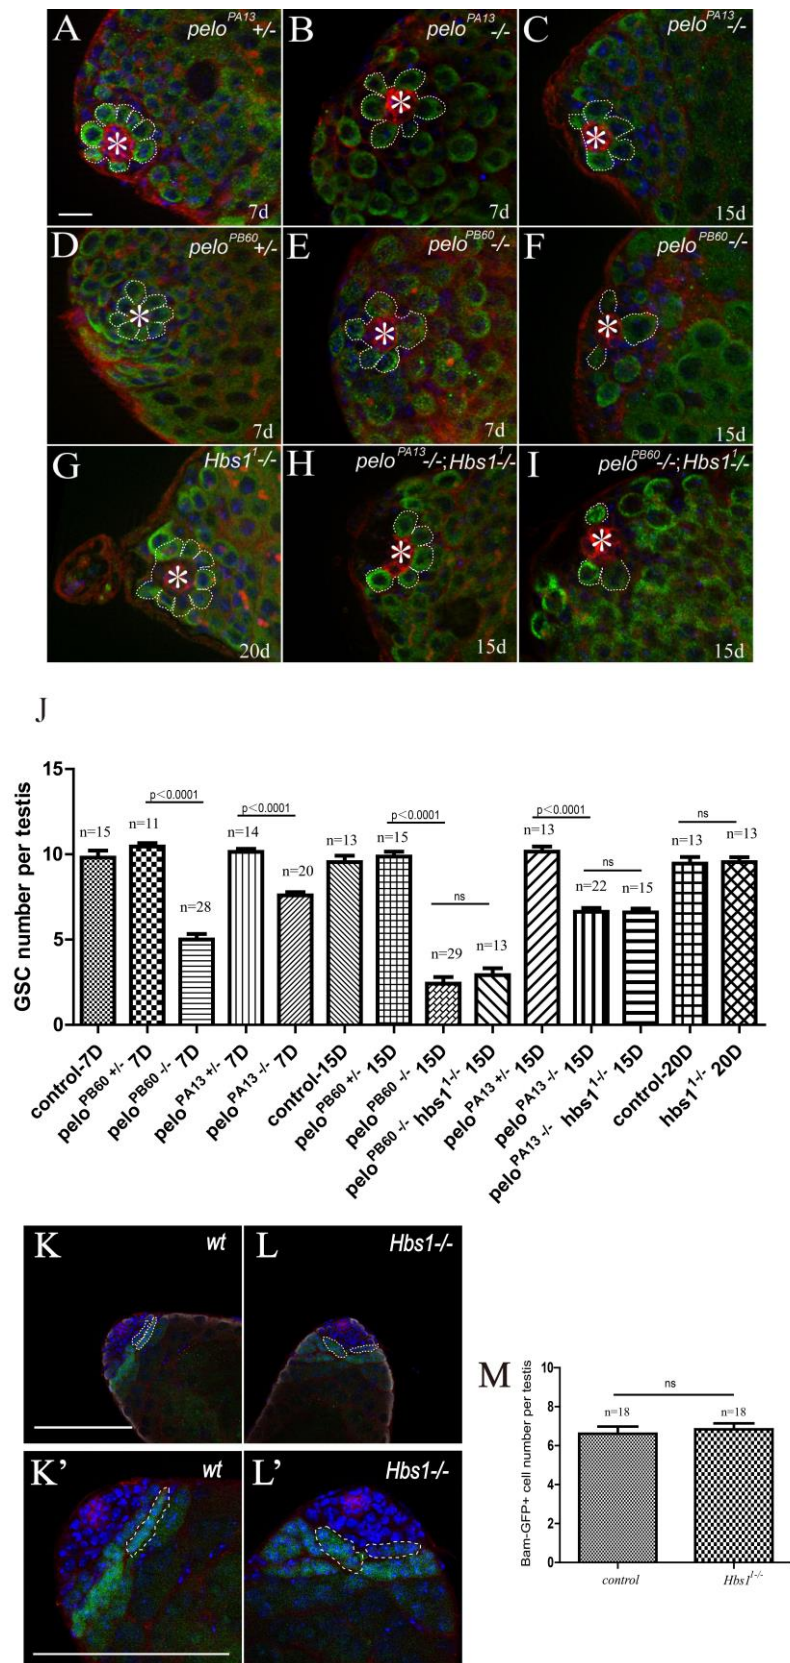

Figure S4
